# Supplementary material
Source: PubMed Central journal article supplement (PMC4464987)
Supplement: NIHMS668996-supplement-Supp_MaterialS2.pdf [file NIHMS668996-supplement-Supp_MaterialS2.pdf]

### COMPASS-31 Scoring Algorithm.

The raw domain scores are derived by adding the points for the questions comprising each domain. Where an answer to a question is not assigned a point, the score for that answer is zero. The final domain scores are generated by multiplying the raw score with a weight index. The total score is the sum of all domain scores.

| Domain                         | Item | Answer | Points |
|--------------------------------|------|--------|--------|
| <b>Orthostatic Intolerance</b> |      |        |        |
|                                | 1    | 1      | 1      |
|                                | 2    | 2      | 1      |
|                                |      | 3      | 2      |
|                                |      | 4      | 3      |
|                                | 3    | 1      | 1      |
|                                |      | 2      | 2      |
|                                |      | 3      | 3      |
|                                | 4    | 1      | 3      |
|                                |      | 2      | 2      |
|                                |      | 3      | 1      |
| <b>Vasomotor</b>               |      |        |        |
|                                | 5    | 1      | 1      |
|                                | 6    | 1      | 1      |
|                                |      | 2      | 1      |
|                                | 7    | 1      | 3      |
|                                |      | 2      | 2      |
|                                |      | 3      | 1      |
| <b>Vasomotor</b>               |      |        |        |
|                                | 8    | 1      | 1      |
|                                |      | 4      | 1      |
|                                |      | 5      | 2      |
|                                | 9    | 1      | 1      |
|                                | 10   | 1      | 1      |
|                                | 11   | 2      | 3      |
| <b>Gastrointestinal</b>        |      |        |        |
|                                | 12   | 1      | 2      |
|                                |      | 2      | 1      |
|                                | 13   | 1      | 1      |
|                                |      | 2      | 2      |
|                                | 14   | 1      | 1      |
|                                |      | 2      | 2      |
|                                | 15   | 1      | 1      |
|                                |      | 2      | 2      |

|              |    |   |   |
|--------------|----|---|---|
|              | 16 | 1 | 1 |
|              | 17 | 2 | 1 |
|              |    | 3 | 2 |
|              |    | 4 | 3 |
|              | 18 | 1 | 1 |
|              |    | 2 | 2 |
|              |    | 3 | 3 |
| <hr/>        |    |   |   |
| Secretomotor | 19 | 1 | 3 |
|              |    | 2 | 2 |
|              |    | 3 | 1 |
|              | 20 | 1 | 1 |
|              | 21 | 2 | 1 |
|              |    | 3 | 2 |
|              |    | 4 | 3 |
|              | 22 | 1 | 1 |
|              |    | 2 | 2 |
|              |    | 3 | 3 |
|              | 23 | 1 | 3 |
|              |    | 2 | 2 |
|              |    | 3 | 1 |
| <hr/>        |    |   |   |
| Bladder      |    |   |   |
|              | 24 | 2 | 1 |
|              |    | 3 | 2 |
|              |    | 4 | 3 |
|              | 25 | 2 | 1 |
|              |    | 3 | 2 |
|              |    | 4 | 3 |
|              | 26 | 2 | 1 |
|              |    | 3 | 2 |
|              |    | 4 | 3 |
| <hr/>        |    |   |   |
| Pupillomotor |    |   |   |
|              | 27 | 2 | 1 |
|              |    | 3 | 2 |
|              |    | 4 | 3 |
|              | 28 | 1 | 1 |
|              |    | 2 | 2 |
|              |    | 3 | 3 |
|              | 29 | 2 | 1 |
|              |    | 3 | 2 |
|              |    | 4 | 3 |
|              | 30 | 1 | 1 |
|              |    | 2 | 2 |

|    |   |   |
|----|---|---|
|    | 3 | 3 |
| 31 | 2 | 3 |
|    | 3 | 2 |
|    | 4 | 1 |
